# Supplementary material
Source: PubMed Central journal article supplement (PMC3213422)
Supplement: tjp0589-4759-SD1.pdf [file tjp0589-4759-SD1.pdf]

**Supplemental Table 1**

Body and muscle masses of control and DEX-treated female and male WT and MAFbx KO mice

| <b>Females</b>  | <b>WT Con</b><br>(n=3) | <b>WT DEX</b><br>(n=4)  | <b>KO Con</b><br>(n=7)    | <b>KO DEX</b><br>(n=7)    |
|-----------------|------------------------|-------------------------|---------------------------|---------------------------|
| Starting BW(g)  | 23.2 ± 0.5             | 23.8 ± 1.7              | 23.5 ± 1.5                | 23.3 ± 1.97               |
| Final BW (g)    | 24.4 ± 1.4             | 20.8 ± 0.95*            | 24.8 ± 1.95               | 20.9 ± 1.5*               |
| Heart (mg)      | 121.0 ± 5.0            | 117.8 ± 6.9             | 121.4 ± 3.0               | 114.4 ± 5.4 <sup>¶</sup>  |
| Spleen (mg)     | 104.0 ± 13.1           | 46.5 ± 9.7 <sup>¥</sup> | 111.4 ± 22.5              | 48.4 ± 8.3 <sup>¶</sup>   |
| <b>Males</b>    | <b>WT Con</b><br>(n=7) | <b>WT DEX</b><br>(n=8)  | <b>KO Con</b><br>(n=8)    | <b>KO DEX</b><br>(n=8)    |
| Starting BW (g) | 28.7 ± 1.6             | 30.2 ± 2.9              | 30.6 ± 3.3                | 28.0 ± 2.7                |
| Final BW (g)    | 29.4 ± 1.5             | 27.7 ± 1.2*             | 31.5 ± 3.1                | 26.6 ± 2.97*              |
| Heart (mg)      | 139.6 ± 7.5            | 138.6 ± 14.3            | 146.4 ± 10.4              | 130.3 ± 11.9 <sup>¶</sup> |
| Spleen (mg)     | 85.0 ± 9.7             | 56.3 ± 7.9 <sup>¥</sup> | 103.6 ± 10.1 <sup>¥</sup> | 58.3 ± 8.97 <sup>¶</sup>  |

Data are mean ± SD. BW, body wt. \* $P < 0.05$  vs. Starting BW, <sup>¥</sup> $P < 0.05$  vs. WT Con, <sup>¶</sup> $P < 0.05$  vs. KO Con

**Supplemental Table 2**

Body and muscle masses of control and ND female WT and MuRF1 KO mice

| <b>Females</b>  | <b>WT Con</b><br>(n=3) | <b>WT ND</b><br>(n=6) | <b>KO Con</b><br>(n=4)    | <b>KO ND</b><br>(n=7)    |
|-----------------|------------------------|-----------------------|---------------------------|--------------------------|
| Starting BW (g) | NA                     | 27.4 ± 3.8            | NA                        | 24.1 ± 1.8               |
| Final BW (g)    | 26.2 ± 3.5             | 24.2 ± 3.6*           | 26.1 ± 3.7                | 21.3 ± 1.7*              |
| Heart (mg)      | 111.0 ± 3.0            | 108.2 ± 9.0           | 136.5 ± 11.4 <sup>‡</sup> | 120.6 ± 9.8 <sup>¶</sup> |

Data are mean ± SD. BW, body wt. \**P*<0.05 vs. Starting BW, <sup>‡</sup>*P*<0.05 vs. WT Con, <sup>¶</sup>*P*<0.05 vs. KO Con

# Supplemental Figure 1

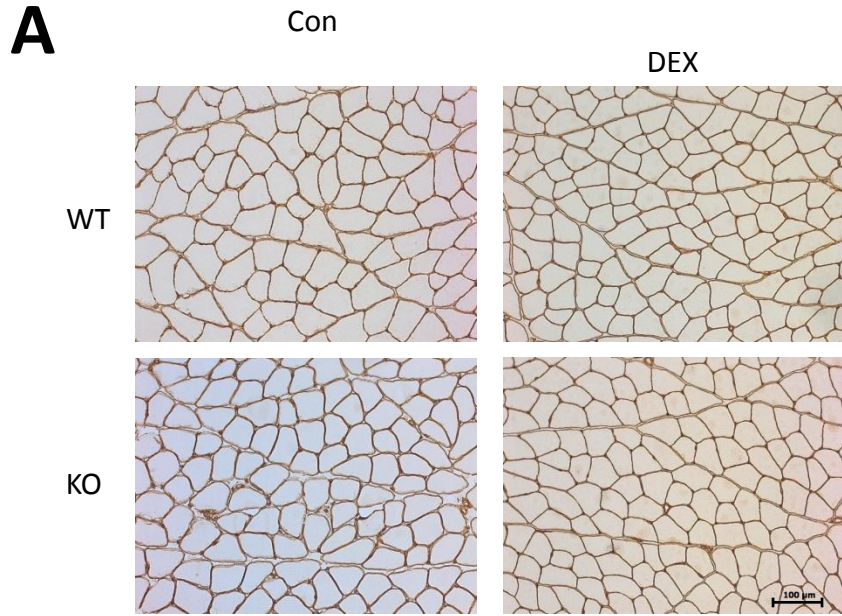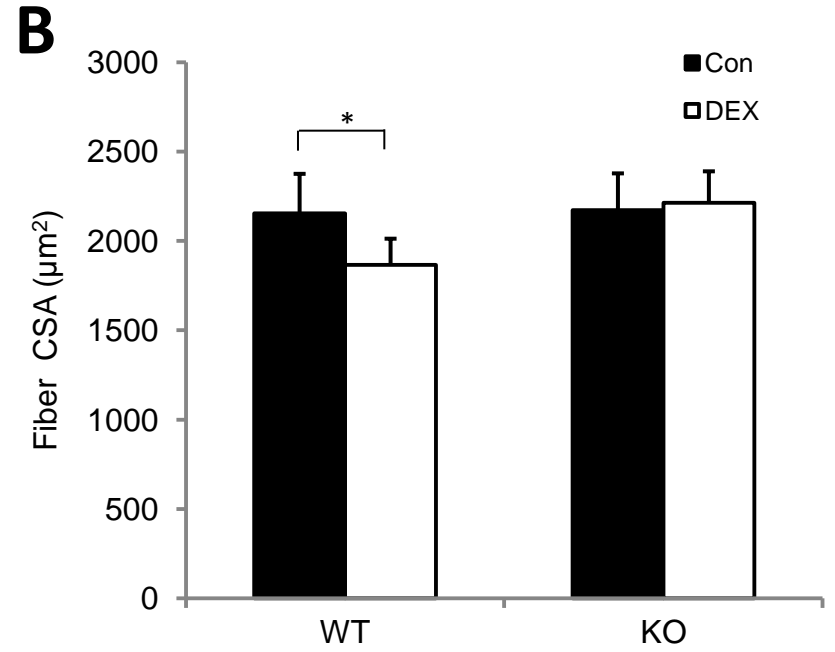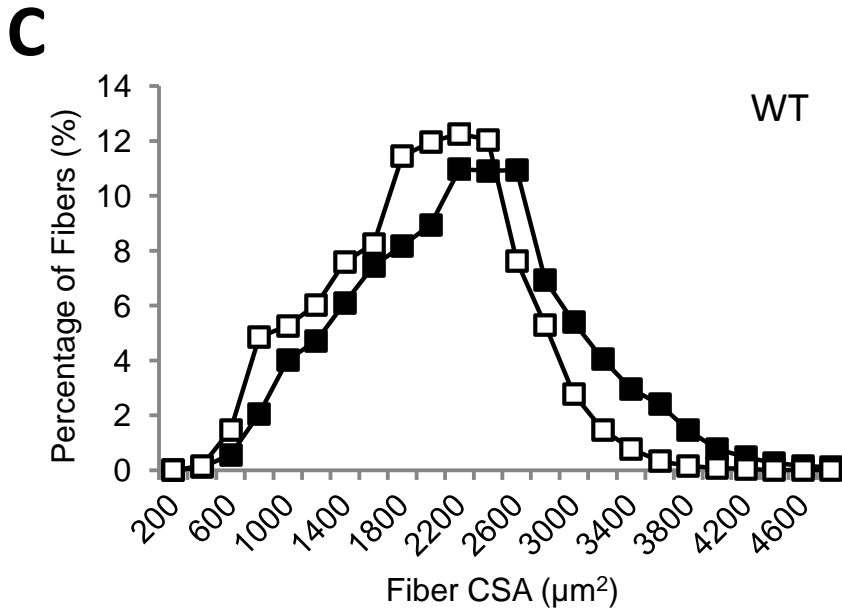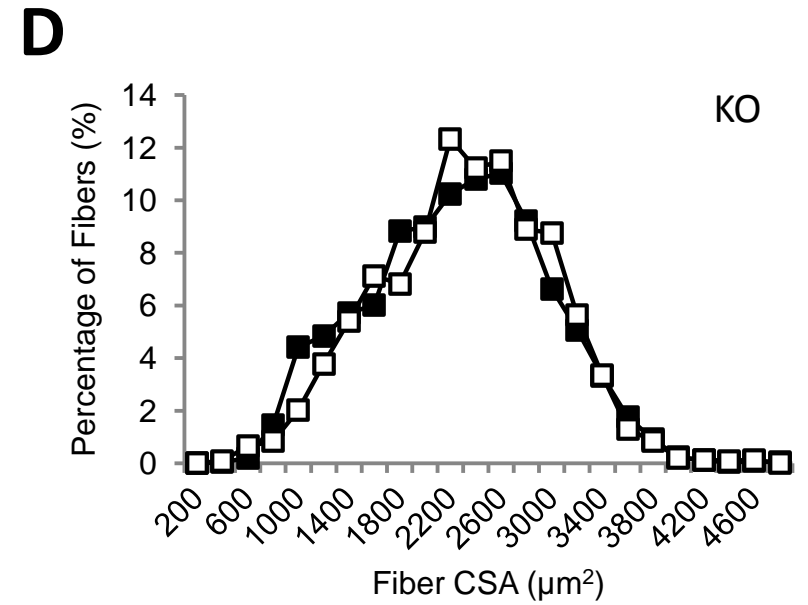

**Figure S1: Sparing of muscle fiber size in MuRF1 null (KO) mice following 14 days of dexamethasone (DEX) treatment.** The fiber-cross-sectional area (CSA) of muscle fibers in the gastrocnemius muscle (GA) of male wild type (WT) and MuRF1 KO mice were determined from laminin-stained cross-sections. **(A)** Representative laminin-stained cross-sections of the same region within the GA muscle for each experimental group. Original magnification x200, scale bar: 100  $\mu$ m. **(B)** Histogram of the mean  $\pm$  SD fiber CSA from the GA of control (*solid bars*) and 14 day DEX-treated (*solid bars*) WT and MuRF1 KO mice (n=3-5/group). \*P<0.01. **(C, D)** Distributions of fiber cross-sectional areas of fibers in the GA of WT **(C)** and KO **(D)** mice following no treatment (Con,  $\blacksquare$ ) or 14 days of DEX treatment (DEX,  $\square$ ).

## Supplemental Figure 2

**A**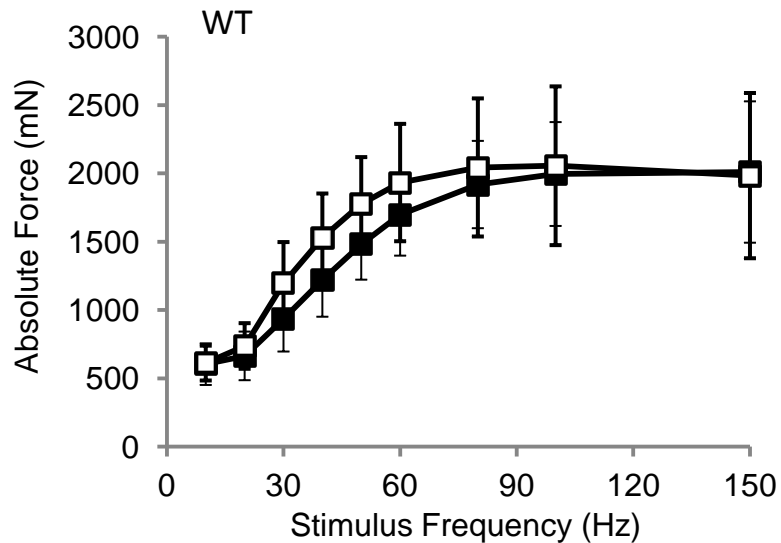**B**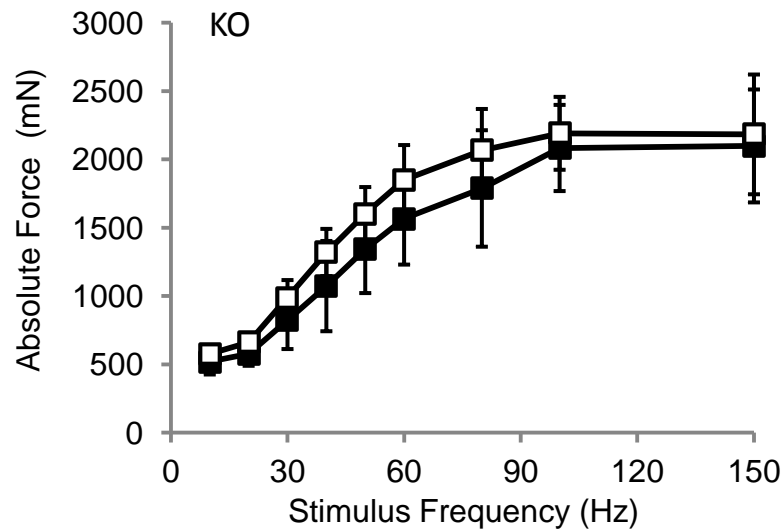**C**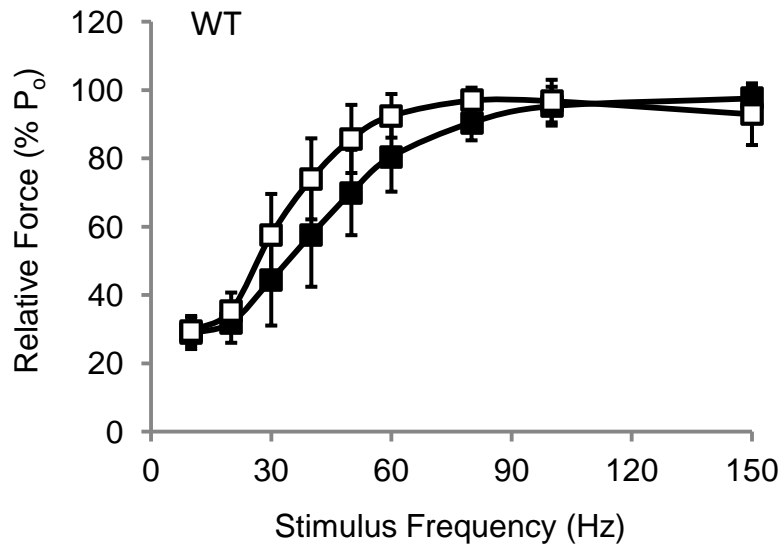**D**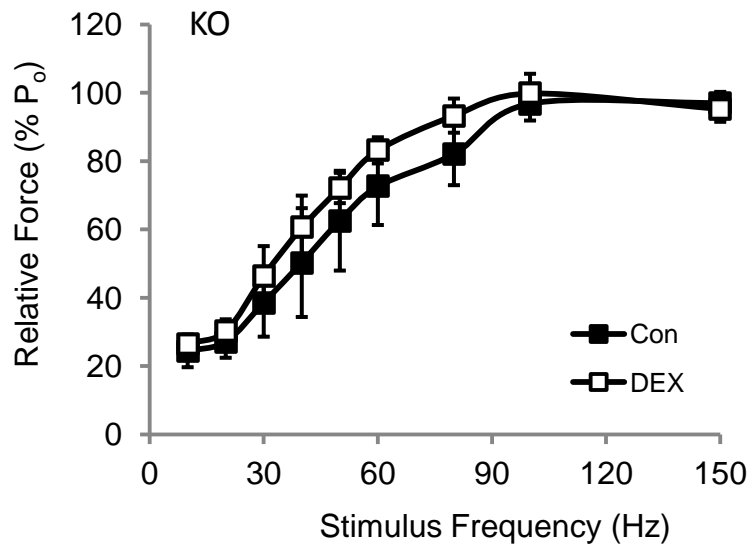

**Figure S2: Force-frequency relationship in the gastrocnemius of wild type (WT) and MuRF1 null (KO) mice following 14 days of dexamethasone (DEX) treatment.** Isometric force production at frequencies ranging from 10 to 150 Hz was measured in the gastrocnemius muscle (GA) of WT (**A, C**) and MuRF1 KO (**B, D**) mice following no treatment (■) or 14 days of DEX treatment (□). The force-frequency relationship is plotted as frequency versus both absolute force (mN, **A, B**) and relative force (percent of maximum isometric force, **C, D**) production. Data are mean  $\pm$  SD for n=5-8/group.

**A** **$\beta 1$** **20S**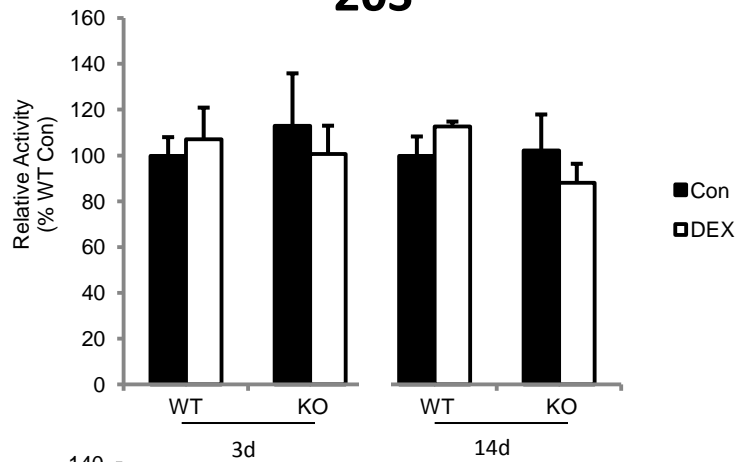 **$\beta 2$** 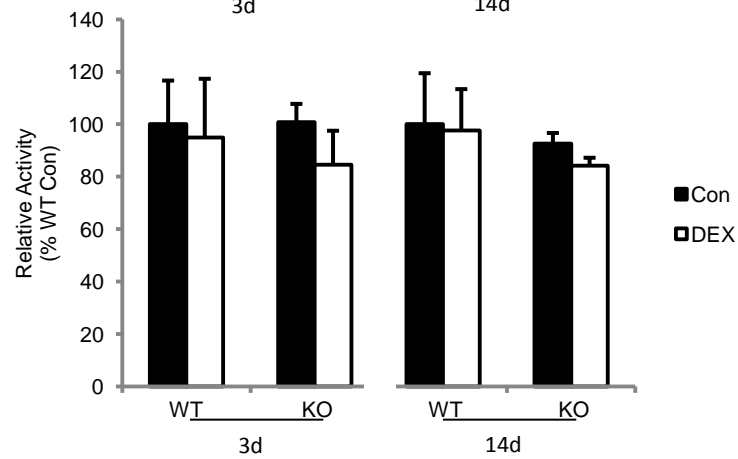 **$\beta 5$** 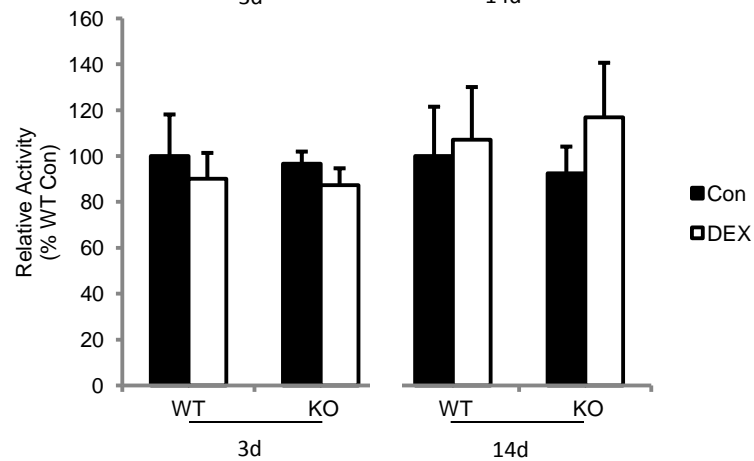**B****26S**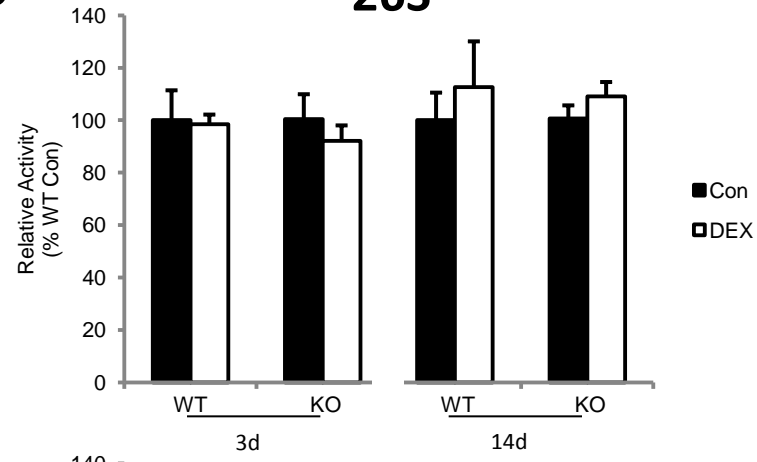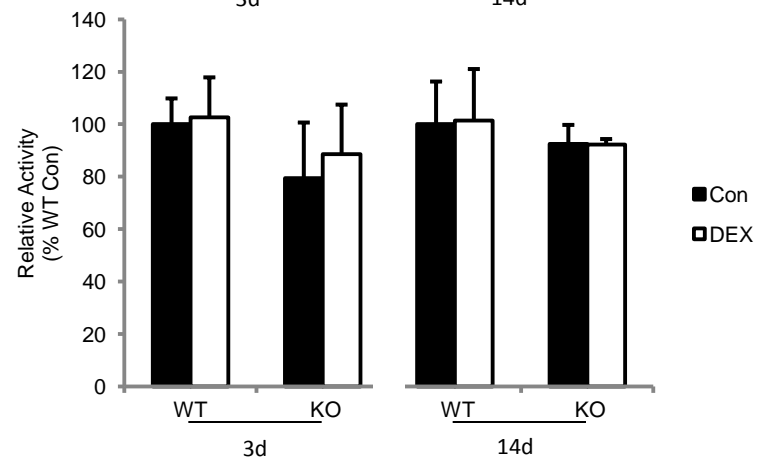

**Figure S3: Proteolytic activity of the 20S and 26S proteasome subunits in wild type (WT) and MuRF1 null (KO) mice after dexamethasone (DEX) treatment. (A)** Proteolytic activity of the  $\beta$ 1,  $\beta$ 2, and  $\beta$ 5 subunits of the 20S proteasome was measured by fluorometric assay after either three or 14 days in WT and MuRF1 KO mice following no treatment (Con, *solid bars*) or DEX treatment (DEX, *open bars*). **(B)** Proteolytic activity of the  $\beta$ 1 and  $\beta$ 2 subunits of the 26S proteasome was measured by fluorometric assay after either three or 14 days in WT and MuRF1 KO mice following no treatment (Con, *solid bars*) or DEX treatment (DEX, *open bars*). Data is expressed as a percent of WT control (n=3-4/group). \*P<0.05.



**A**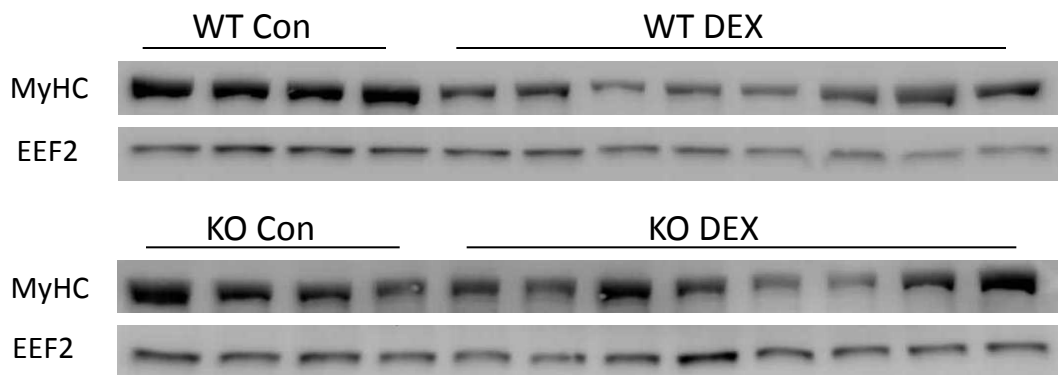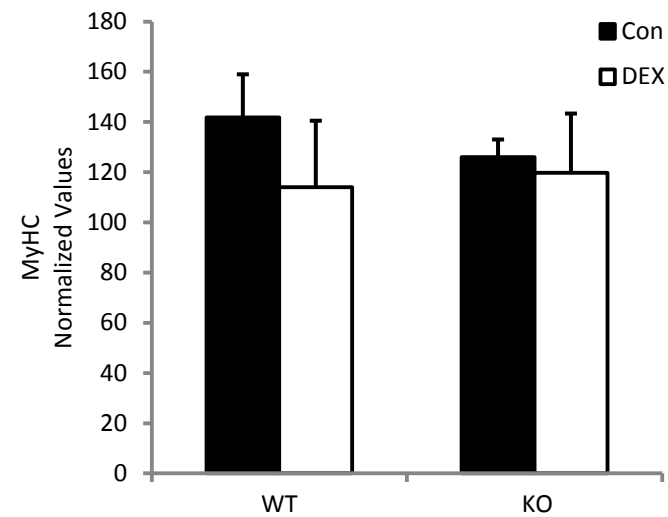**B**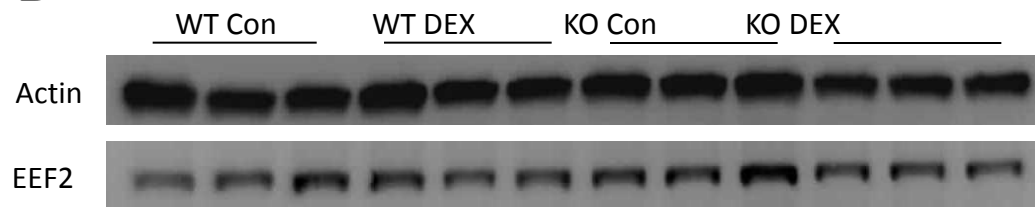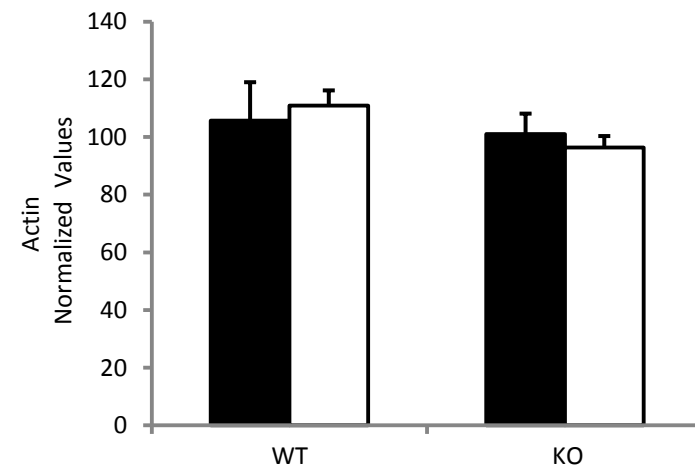

**Figure S4: Expression of the fast isoform of myosin heavy chain and actin protein is not altered after 14 days of dexamethasone (DEX) treatment.** Western blots of myosin heavy chain (fast) **(A)** and actin **(B)** protein expression in wild type (WT) and MuRF1 null (KO) mice after 14 days of DEX treatment. Protein expression was quantified by densitometry and normalized to EEF2 (*control, solid bars; DEX, open bars*).
